# Supplementary material for: Knockdown SENP1 Suppressed the Angiogenic Potential of Mesenchymal Stem Cells by Impacting CXCR4-Regulated MRTF-A SUMOylation and CCN1 Expression
Source: MDPI journal article supplement (doi:10.3390/biomedicines11030914), 2023-03-15
Supplement: s1 [file s1]

**Table S1: Primers used for PCR.**

|           | Forward                                                    | Reverse                                                            |
|-----------|------------------------------------------------------------|--------------------------------------------------------------------|
| Dll4      | CAGTGGGCAGCGAAGCTACA                                       | ACAGGCAGTGGTAGCCATCCTC                                             |
| Ephrin B2 | CTCCTCAACTGTGCCAAACCA                                      | GGTTATCCAGGCCCTCCAAA                                               |
| Notch1    | CATCACCTGCCTGTTAGGAG                                       | ACACATGGCAACATCTAACCC                                              |
| Hey2      | TTCAAGGCAGCTCGGTAAGTAC                                     | CATACTGATGCACTGCTGGATGG                                            |
| SUMO1     | CAGGAGGCAAAACCTTCAAC                                       | CTCCATTCCCAGTTCTTTTCG                                              |
| SUMO2     | ACGAGAAACCCAAGGAAGGA                                       | CTCCATTTCCTCAACTGTGCAG                                             |
| SEN1      | TTGGCCAGAGTGCAAATGG                                        | TCGGCTGTTTCTTGATTTTGTAA                                            |
| SEN2      | AGCCTGGTGGTGATTGACCTAAGA                                   | AGCTGTTGAGGAATCTCGTGTGGT                                           |
| CCN1      | AGCAGCGTTTCCCTTCTAC                                        | TGAGTCCCATCACCCACA                                                 |
| GAPDH     | GAGCTGAACGGGAAGCTCACTG                                     | TGGTGCTCAGTGTAGCCCAGGA                                             |
| shSEN1    | TCGAGCGCCAGATTGAAGAACTCGAG<br>TTCTGTTCTTCAATCTGGCGCTTTTTCG | GATCCAAAAAGCGCCAGATTGAAGAA<br>CAGAACTCGAGTTCTGTTCTTCAATCT<br>GGCGC |

**Table S2: Primers used for PCR during ChIP analysis.**

|      | Forward            | Reverse            |
|------|--------------------|--------------------|
| CCN1 | CAGGTTGCGTAGCCATCC | TGGTAGCCACCTGCCTCT |

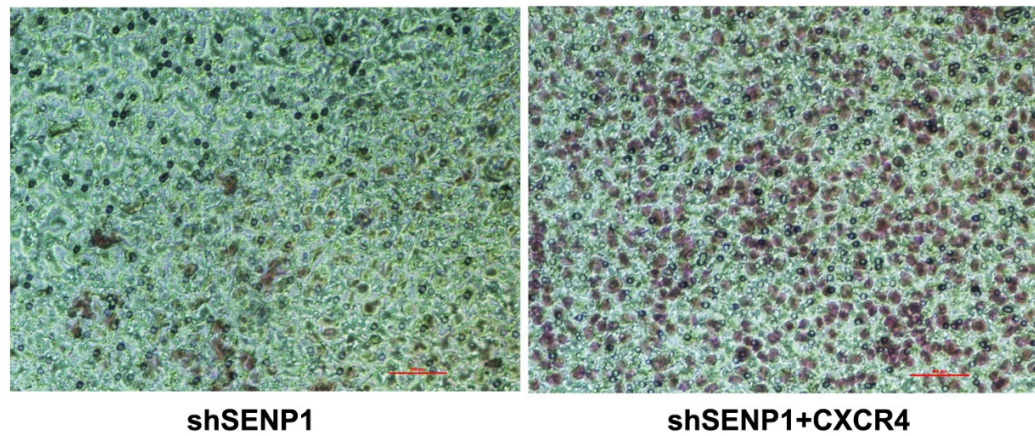

**Figure S1:** Overexpression of CXCR4 restored the cell invasion capacity. The migration capabilities of MSCs<sup>shSENP1</sup> group and MSCs<sup>shSENP1</sup> with CXCR4 overexpression group were analysed using a Transwell assay with  $1.0 \times 10^4$  cells in 200  $\mu$ L of a 1% FBS-containing medium. The lower chamber was filled with 600  $\mu$ L of medium containing 10% FBS. Twenty-four hours later, cells that had migrated to the lower side of the membrane were fixed in 4% paraformaldehyde and stained with crystal violet.

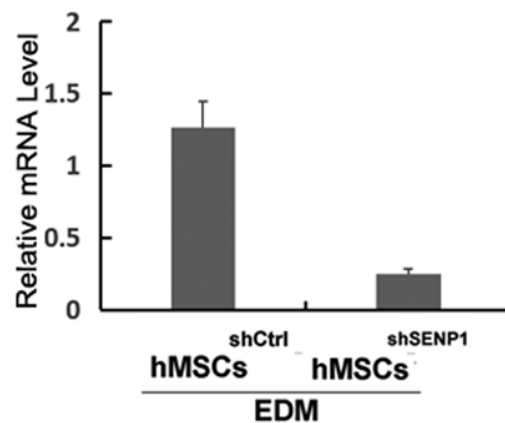

**Figure S2:** Knockdown of SENP1 suppressed the mRNA level of SDF-1 as determined by RT-PCR.
